# Supplementary figures and images for: Activation of monocytes and cytokine production in patients with peripheral atherosclerosis obliterans
Source: Springer Nature journal article supplement (doi:10.1186/1476-9255-8-23), 2011-08-29

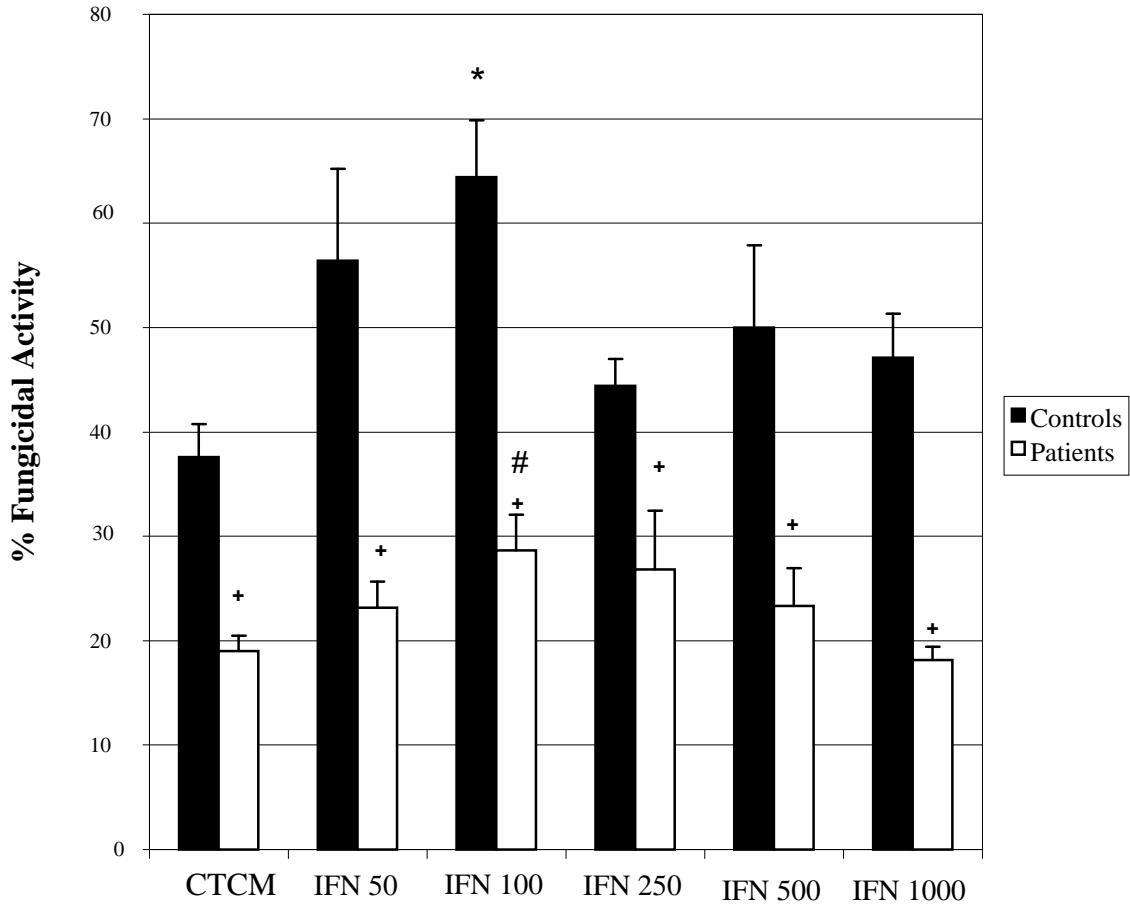

Supplement: 12950_2011_201_MOESM1_ESM.pdf [file 12950_2011_201_MOESM1_ESM.pdf]
